# Supplementary material
Source: PubMed Central journal article supplement (PMC7470819)

**Figure S1. Timelines of Infectious Disease Outbreak Preparations and Response in South Korea and Seoul National University Bundang Hospital (SNUBH), 2014-2020**

A. MERS Response and Pandemic Preparedness by South Korea and SNUBH, 2014-2019  
 B. COVID-19 Response by South Korea and SNUBH, January to April 2020

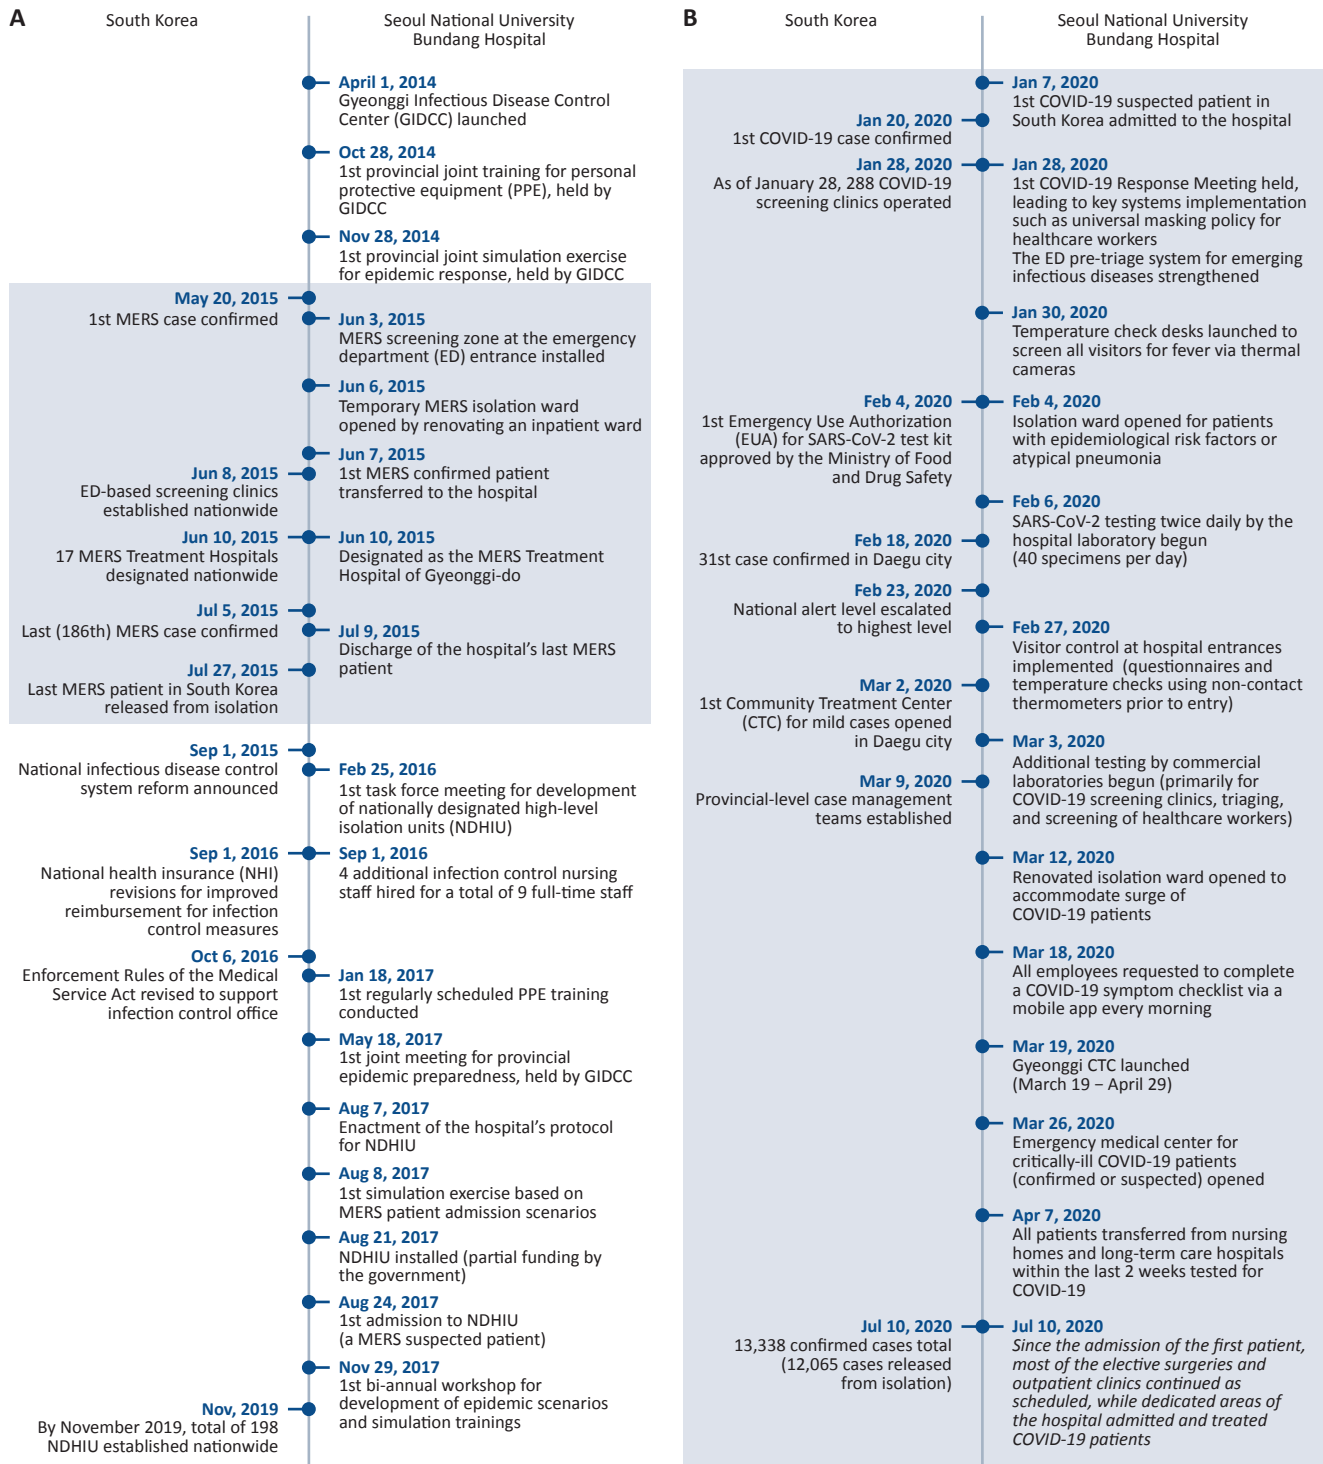

Supplement: mmc1.pdf [file mmc1.pdf]
